# Supplementary material
Source: Springer Nature journal article supplement (https://www.springermedizin.de/resource/supplementary/12882_2011_252_MOESM1_ESM.pdf/9453378)

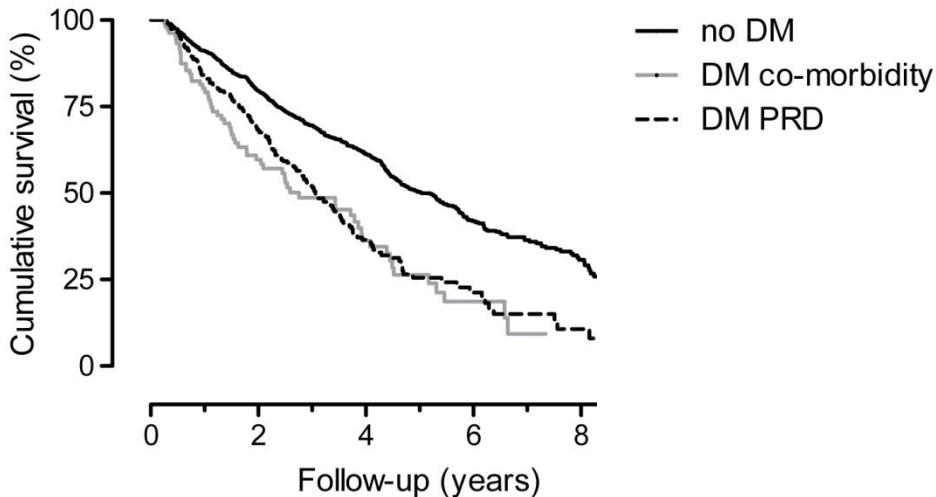

**Number of patients  
at risk (n)**

|                      | <b>0</b> | <b>2</b> | <b>4</b> | <b>6</b> | <b>8</b> |
|----------------------|----------|----------|----------|----------|----------|
| <b>No DM</b>         | 1465     | 792      | 371      | 114      | 30       |
| <b>DM as PRD</b>     | 281      | 144      | 42       | 12       | 3        |
| <b>DM as co-morb</b> | 107      | 44       | 18       | 5        | 0        |

Supplement: MOESM1 [file 9453378]
